# Supplementary material for: Building a dishonest signal: the functional basis of unreliable signals of strength in males of the two-toned fiddler crab,Uca vomeris
Source: Oxford University Press journal article supplement (doi:10.1242/jeb.120857), 2015-01-01
Supplement: jeb120857supp.pdf [file jeb120857supp.pdf]

Table S1. Raw dataset used for all statistical analyses.

| id    | type | mass | width | length | depth | c1         | c2         | c3         |
|-------|------|------|-------|--------|-------|------------|------------|------------|
| b1m10 | o    | 3.13 | 20.26 | 14.05  | 10.68 | 6.16256999 | 9.0908807  | 9.86500905 |
| b1m11 | o    | 2    | 17.58 | 12.37  | 8.98  | 4.80268683 | 7.37880471 | 8.42505177 |
| b1m12 | o    | 4.4  | 22.68 | 15.73  | 11.78 | 6.6638182  | 10.1650862 | 11.162953  |
| b1m13 | o    | 2.6  | 19.69 | 12.82  | 10.42 | 5.20975779 | 8.53174511 | 9.2557563  |
| b1m15 | o    | 2.35 | 19.49 | 12.89  | 10.16 | 4.95476831 | 7.43007463 | 8.44571445 |
| b1m17 | o    | 2.57 | 22.55 | 12.12  | 10.35 | 5.4939387  | 8.07697164 | 8.68172229 |
| b1m19 | o    | 3.66 | 21.19 | 14.65  | 10.6  | 6.70085786 | 9.81989562 | 10.7607856 |
| b1m5  | o    | 2.46 | 18.79 | 13.03  | 9.59  | 5.69563115 | 7.97273761 | 9.03506291 |
| b1m6  | o    | 2.9  | 20.23 | 14.09  | 10.92 | 6.28132394 | 8.82832395 | 9.29669957 |
| b1m7  | o    | 5.44 | 25.01 | 16.74  | 13.12 | 7.06367294 | 10.9179342 | 12.5994137 |
| b1m8  | o    | 4.48 | 24.25 | 15.51  | 12.78 | 7.45694421 | 10.6998699 | 11.9133784 |
| b1m9  | o    | 4.3  | 21.32 | 14.51  | 11.72 | 6.91421313 | 10.0140459 | 11.7216844 |
| b2m15 | o    | 4.75 | 23.68 | 15.71  | 13.25 | 7.11116799 | 10.5152247 | 11.8243121 |
| b2m19 | o    | 5.04 | 23.19 | 15.74  | 12.45 | 7.65843884 | 11.3395004 | 12.9139854 |
| b2m2  | o    | 4.35 | 22.18 | 15.55  | 12.28 | 7.06916466 | 10.3280102 | 11.7646055 |
| b2m21 | o    | 4.47 | 22.44 | 15.84  | 11.42 | 6.66734569 | 9.93769122 | 11.3330246 |
| b2m22 | o    | 2.39 | 18.73 | 12.68  | 9.7   | 4.89759212 | 7.85627573 | 8.7903198  |
| b2m30 | o    | 4.31 | 22.21 | 15.61  | 12.19 | 6.88490584 | 10.2290428 | 11.6947284 |
| b2m31 | o    | 2.64 | 18.66 | 13.14  | 10.31 | 5.67434705 | 8.47197991 | 9.68447921 |
| b2m4  | o    | 2.47 | 19.01 | 13.17  | 10.49 | 4.65257196 | 7.76479768 | 9.89359221 |
| b2m6  | o    | 3.54 | 21.01 | 14.64  | 12.04 | 6.94346489 | 9.76410894 | 10.454505  |
| b2m7  | o    | 3.96 | 22.02 | 15.47  | 11.97 | 6.55498604 | 9.56658592 | 10.6327515 |
| b3m10 | o    | 5.76 | 23.64 | 16.73  | 12.41 | 6.62928261 | 10.6914302 | 12.0858224 |
| b3m13 | o    | 7.27 | 26.39 | 18.64  | 14.31 | 7.50697357 | 11.5842435 | 13.7790935 |
| b3m14 | o    | 7.46 | 28.19 | 18.65  | 13.45 | 8.71044906 | 12.3235165 | 14.1547753 |
| b3m16 | o    | 6.28 | 26.32 | 17.62  | 13.22 | 7.45776878 | 11.1475017 | 11.1487091 |
| b3m17 | o    | 7.51 | 26.98 | 18.08  | 14.19 | 8.33447999 | 12.6355274 | 13.8881936 |
| b3m18 | o    | 6.71 | 26.86 | 17.77  | 13.7  | 7.97313856 | 11.8889671 | 13.2059953 |
| b3m19 | o    | 4.86 | 23.35 | 16.11  | 12.31 | 7.06627609 | 10.3231549 | 10.3935978 |
| b3m21 | o    | 7.89 | 28.17 | 18.64  | 19.71 | 8.82811881 | 13.1367493 | 14.3258876 |
| b3m22 | o    | 4.39 | 22.81 | 15.77  | 12.43 | 6.39536769 | 9.6232963  | 11.1909441 |
| b3m23 | o    | 6.16 | 24.83 | 16.56  | 12.9  | 7.72040587 | 11.4702752 | 12.456732  |
| b3m24 | o    | 2.26 | 18.49 | 12.66  | 9.91  | 4.92498009 | 7.29586857 | 8.54433896 |
| b3m25 | o    | 6.46 | 25.04 | 17.42  | 13.3  | 7.12421318 | 11.7091849 | 13.0022161 |
| b3m26 | o    | 6.43 | 25.85 | 17.02  | 13.72 | 8.0712884  | 11.5202981 | 13.7810922 |
| b3m27 | o    | 6.94 | 26.37 | 17.52  | 13    | 8.21729897 | 12.2279112 | 13.148232  |
| b3m28 | o    | 2.64 | 19.19 | 13.42  | 9.83  | 4.57572742 | 7.59194822 | 8.6851618  |
| b3m3  | o    | 7.55 | 27.07 | 18.19  | 13.27 | 8.62863583 | 13.0510115 | 14.1156185 |
| b3m5  | o    | 5.14 | 24.16 | 16.03  | 12.13 | 7.46765433 | 10.5577852 | 11.7684033 |
| b3m6  | o    | 6.35 | 25.27 | 17.27  | 13.47 | 7.57074694 | 11.645338  | 12.4789291 |
| b3m7  | o    | 4.25 | 21.96 | 15.25  | 11.56 | 6.89459537 | 10.0758743 | 11.6478218 |
| b3m8  | o    | 6.91 | 25.71 | 17.89  | 13.36 | 8.17061787 | 12.1970465 | 13.6214986 |

|       |   |      |       |       |       |            |            |            |
|-------|---|------|-------|-------|-------|------------|------------|------------|
| b4m11 | o | 3.43 | 21.48 | 14.07 | 10.54 | 6.68477778 | 8.88412364 | 10.0273581 |
| b4m14 | o | 3.14 | 20.14 | 13.6  | 10.05 | 6.74980588 | 9.23170868 | 9.97371168 |
| b4m15 | o | 4.26 | 21.9  | 15.05 | 11.69 | 6.59538853 | 9.84150155 | 10.9605576 |
| b4m17 | o | 4.51 | 23.29 | 15.02 | 10.87 | 7.60690475 | 10.4689299 | 11.2577729 |
| b4m19 | o | 1.31 | 15.74 | 10.38 | 7.79  | 4.03462862 | 5.88131479 | 6.76051099 |
| b4m2  | o | 1.6  | 16.6  | 11.03 | 8.79  | 4.15199615 | 6.53473731 | 7.50874734 |
| b4m21 | o | 3.22 | 19.54 | 13.71 | 10.38 | 6.26680834 | 8.82366392 | 10.1178318 |
| b4m3  | o | 2.45 | 19.3  | 13.1  | 9.71  | 5.56037199 | 7.54156543 | 8.24568846 |
| b4m4  | o | 1.95 | 17.27 | 11.66 | 9.37  | 5.22566051 | 7.50112877 | 8.4353877  |
| b4m6  | o | 3.89 | 21.53 | 14.55 | 11.54 | 6.6595531  | 9.66115999 | 10.9612163 |
| b4m8  | o | 1.45 | 16.16 | 10.61 | 8.16  | 4.24139819 | 5.99988848 | 6.51070712 |
| b4m9  | o | 2.21 | 17.75 | 12.44 | 9.66  | 5.20419146 | 7.65311912 | 7.95027297 |
| b5m11 | o | 8.17 | 27.04 | 17.54 | 14.28 | 8.9966216  | 13.385484  | 14.7038239 |
| b5m13 | o | 6.52 | 25.52 | 18.04 | 13.61 | 7.91899818 | 11.8824431 | 12.7700561 |
| b5m14 | o | 6.24 | 25.42 | 17.31 | 13.37 | 7.63309188 | 11.4742998 | 13.0834527 |
| b5m17 | o | 8.72 | 29.65 | 19.17 | 14.16 | 9.2094604  | 13.5237266 | 15.7713    |
| b5m19 | o | 4.05 | 23.19 | 15.15 | 11.3  | 6.58437966 | 9.95357767 | 10.9007832 |
| b5m20 | o | 6.45 | 25.43 | 16.88 | 12.53 | 7.44782277 | 12.2679734 | 13.3291419 |
| b5m21 | o | 7.22 | 27.48 | 18.63 | 13.64 | 8.24247951 | 12.5120198 | 14.2421394 |
| b5m22 | o | 6.84 | 26.29 | 17.8  | 13.71 | 8.51197559 | 12.4291822 | 13.0940412 |
| b5m23 | o | 6.09 | 24.69 | 16.99 | 12.67 | 8.34707304 | 11.7721338 | 12.9987322 |
| b5m24 | o | 3.51 | 20.68 | 14.04 | 10.39 | 6.6014749  | 9.469604   | 10.734384  |
| b5m25 | o | 3.47 | 21.16 | 14.75 | 10.95 | 6.60872389 | 9.67434698 | 10.5215873 |
| b5m26 | o | 6.85 | 25.7  | 17.77 | 13.05 | 8.1064239  | 11.9298744 | 13.0649654 |
| b5m27 | o | 6.4  | 23.84 | 16.77 | 12.17 | 8.08093961 | 12.1867057 | 14.1235037 |
| b5m28 | o | 6.73 | 25.37 | 17.48 | 13.06 | 8.88664952 | 13.2151924 | 13.7981074 |
| b5m29 | o | 5.88 | 25.29 | 16.86 | 12.83 | 8.01329459 | 11.8472386 | 13.4193368 |
| b5m30 | o | 4.78 | 23.07 | 15.99 | 12.93 | 6.88962688 | 10.4031779 | 11.7849681 |
| b5m31 | o | 6.48 | 26.15 | 17.26 | 12.6  | 8.14365475 | 11.9250399 | 13.1551245 |
| b5m32 | o | 6.94 | 24.52 | 16.47 | 12.06 | 7.9892006  | 11.755646  | 13.1872911 |
| b5m33 | o | 7.17 | 25.87 | 17.83 | 13.08 | 8.45042249 | 12.1880693 | 13.0050803 |
| b5m34 | o | 7.76 | 27.13 | 18.25 | 13.49 | 9.09123835 | 13.0638889 | 14.3943551 |
| b5m35 | o | 8.01 | 26.51 | 17.88 | 13.02 | 9.57806495 | 13.8485986 | 14.907689  |
| b5m36 | o | 4.08 | 21.56 | 14.64 | 10.14 | 5.92174566 | 9.54007979 | 10.579074  |
| b5m37 | o | 2.33 | 18.45 | 12.35 | 9.37  | 4.54412517 | 7.2988658  | 8.76789099 |
| exm1  | r | 3.76 | 23.8  | 15.87 | 11.54 | 6.09094741 | 9.40348867 | 9.63685559 |
| exm2  | r | 2.6  | 20.55 | 13.58 | 10.8  | 6.82485589 | 10.1161905 | 9.92499586 |
| exm3  | r | 3.05 | 21.46 | 14.88 | 11.11 | 5.67387197 | 8.96624432 | 9.13392183 |
| exm4  | r | 4.13 | 24.92 | 17.25 | 12.81 | 5.26752642 | 7.98061512 | 7.97987544 |
| exm5  | r | 5.1  | 23.18 | 15.77 | 13.08 | 9.31159162 | 13.3883141 | 14.0796858 |
| exm8  | r | 4.79 | 24.26 | 16.11 | 11.52 | 9.55084141 | 13.1428643 | 12.4938294 |
| exm11 | r | 4.34 | 23.07 | 15.89 | 13.08 | 7.95166974 | 12.1400602 | 11.3135541 |
| exm12 | r | 4.84 | 23.61 | 16.41 | 12.34 | 8.92617231 | 12.8092862 | 12.924775  |
| exm14 | r | 3.22 | 21.71 | 14.97 | 11.9  | 6.02399546 | 9.88590551 | 9.92033089 |
| b3m11 | r | 8.1  | 29.05 | 18.86 | 15.14 | 8.1250155  | 12.1425178 | 12.3225997 |
| b3m2  | r | 5.62 | 27.04 | 17.74 | 13.4  | 6.12404301 | 9.29474397 | 9.87917009 |

|       |   |      |       |       |       |            |            |            |
|-------|---|------|-------|-------|-------|------------|------------|------------|
| b3m9  | r | 6.24 | 27.5  | 18.04 | 13.64 | 7.00629102 | 10.5691817 | 10.119364  |
| b4m12 | r | 2.82 | 19.53 | 13.27 | 10.35 | 5.15259784 | 8.1021641  | 8.26814808 |
| b4m13 | r | 4.64 | 24.57 | 15.71 | 12.08 | 6.97199756 | 10.0237169 | 9.60407071 |
| b5m1  | r | 4.91 | 24.75 | 16.29 | 12.72 | 5.50923804 | 8.37093106 | 8.1993232  |
| b5m2  | r | 5.28 | 23.31 | 15.47 | 11.86 | 7.02885447 | 10.4965311 | 10.3779793 |
| b5m3  | r | 5.56 | 24.77 | 17.07 | 13.22 | 6.98997955 | 10.762021  | 10.3913376 |
| b5m4  | r | 6.39 | 26.62 | 17.82 | 13.36 | 6.58768174 | 10.2333068 | 10.2989406 |
| b5m5  | r | 4.23 | 23.47 | 15.41 | 11.31 | 6.15530165 | 9.7157554  | 9.34743267 |
| b5m6  | r | 5.91 | 24.57 | 17.07 | 12.58 | 6.85587837 | 10.6166181 | 11.1687807 |
| b5m7  | r | 4.6  | 23.66 | 16.47 | 13.07 | 6.34417668 | 10.0777693 | 9.66239859 |
| b5m8  | r | 7.36 | 26.85 | 18.48 | 13.26 | 7.97893269 | 11.1270713 | 11.8048362 |
| b5m9  | r | 6.75 | 26.44 | 17.94 | 14.97 | 7.56600322 | 11.1303133 | 11.5717255 |
| b6m1  | r | 4.6  | 22.61 | 15.55 | 11.27 | 6.29676389 | 9.87997772 | 9.19986107 |
| b6m10 | r | 6.18 | 24.62 | 17.5  | 12.22 | 7.76231096 | 11.8368157 | 12.857881  |
| b6m2  | r | 4.01 | 22.59 | 16.64 | 12.39 | 4.27364453 | 7.17288948 | 6.92110254 |
| b6m3  | r | 5.82 | 26.59 | 17.1  | 12.42 | 7.51660562 | 11.3478834 | 12.0651289 |
| b6m4  | r | 6.87 | 26.62 | 18.67 | 13.7  | 7.87896538 | 11.3713205 | 11.2363934 |
| b6m5  | r | 5.93 | 24.99 | 18.34 | 13.53 | 7.76289528 | 11.0380162 | 11.6114076 |

| c4         | c5         | c6         | c7         | m_a        | g          | n          |
|------------|------------|------------|------------|------------|------------|------------|
| 4.75888592 | 3.77064286 | 11.203822  | 11.777323  | 0.32016129 | 1269.32832 | 12.4394175 |
| 3.53184959 | 3.23297858 | 8.16356501 | 8.06799313 | 0.40071658 | 435.35232  | 4.26645274 |
| 5.54896696 | 4.31566767 | 14.604375  | 14.9314109 | 0.28903281 | 1278.77296 | 12.531975  |
| 4.5958513  | 3.74673981 | 10.8647706 | 10.9569975 | 0.3419495  | 376.83574  | 3.69299025 |
| 4.17600696 | 3.33306768 | 9.60539991 | 9.84822663 | 0.33844344 | 394.35944  | 3.86472251 |
| 4.27728196 | 3.48237911 | 10.0070424 | 10.6574363 | 0.3267558  | 1071.68854 | 10.5025477 |
| 5.24627069 | 4.17920896 | 13.7281602 | 13.9700197 | 0.29915555 | 501.48258  | 4.91452928 |
| 4.35459784 | 3.56130971 | 11.1401221 | 11.8275332 | 0.30110334 | 457.76016  | 4.48604957 |
| 4.81136091 | 3.94595491 | 11.497233  | 11.9610424 | 0.32990059 | 601.30512  | 5.89279018 |
| 6.51049344 | 4.95189149 | 17.9001994 | 17.5360702 | 0.28238319 | 1170.43056 | 11.4702195 |
| 5.59124446 | 4.77934892 | 16.0365308 | 16.2346695 | 0.29439151 | 1574.10864 | 15.4262647 |
| 5.19536629 | 4.57307583 | 14.2208333 | 14.6669743 | 0.31179409 | 1332.50832 | 13.0585815 |
| 5.70523819 | 4.2543563  | 16.5814886 | 17.7121519 | 0.24019421 | 1366.21292 | 13.3888866 |
| 6.38090915 | 4.98614897 | 17.877321  | 18.1329628 | 0.27497707 | 646.58558  | 6.33653868 |
| 5.87798766 | 4.35827975 | 14.9522401 | 15.9815245 | 0.27270739 | 1807.36855 | 17.7122118 |
| 6.21278762 | 4.20873405 | 14.8874304 | 15.6201529 | 0.26944256 | 1396.50865 | 13.6857848 |
| 4.16632712 | 3.3363813  | 9.92739746 | 10.6131137 | 0.31436404 | 459.00106  | 4.49821039 |
| 5.98583061 | 4.11004421 | 15.3901223 | 15.2725675 | 0.26911285 | 825.8699   | 8.09352502 |
| 4.69957383 | 3.5417757  | 11.4255333 | 12.1441857 | 0.29164374 | 408.36984  | 4.00202443 |
| 4.78339428 | 3.22652344 | 12.1581306 | 12.5496095 | 0.2571015  | 344.04329  | 3.37162424 |
| 5.03455477 | 4.14045172 | 13.8938485 | 14.2481295 | 0.29059616 | 762.37337  | 7.47125903 |
| 5.35236499 | 4.2452882  | 14.8001278 | 15.0394032 | 0.2822777  | 1504.82626 | 14.7472974 |
| 6.44700474 | 4.49459477 | 16.172385  | 16.5890044 | 0.27093819 | 1213.875   | 11.895975  |
| 7.69471667 | 4.95219044 | 18.8855628 | 18.5955653 | 0.26631029 | 1281.105   | 12.554829  |
| 6.67661846 | 4.91931622 | 21.6383979 | 21.3432723 | 0.23048557 | 1254.96    | 12.298608  |
| 6.64306201 | 4.81834415 | 20.2089553 | 21.4087444 | 0.2250643  | 332.415    | 3.257667   |
| 7.03649325 | 5.35781064 | 20.4291126 | 21.297848  | 0.25156582 | 1736.775   | 17.020395  |
| 6.93328951 | 5.24207817 | 18.9261439 | 19.6520068 | 0.26674518 | 1639.665   | 16.068717  |
| 5.99792036 | 4.58243392 | 13.9005676 | 14.4384373 | 0.31737742 | 1034.595   | 10.139031  |
| 7.64828252 | 5.37534784 | 22.2736702 | 23.2500298 | 0.23119746 | 1766.655   | 17.313219  |
| 5.60078152 | 4.14574812 | 13.379194  | 13.642747  | 0.30387928 | 1322.19    | 12.957462  |
| 6.06374206 | 4.74433678 | 17.5085834 | 17.3462845 | 0.27350738 | 1482.795   | 14.531391  |
| 4.07145215 | 3.12940239 | 9.60887626 | 10.2402395 | 0.30559856 | 799.29     | 7.833042   |
| 6.50551875 | 5.10188629 | 17.461535  | 17.6735053 | 0.28867427 | 1045.8     | 10.24884   |
| 6.38469693 | 4.61234973 | 19.356285  | 19.4468062 | 0.23717775 | 1594.845   | 15.629481  |
| 7.08228617 | 4.89314595 | 19.8157215 | 20.6877246 | 0.23652413 | 1647.135   | 16.141923  |
| 4.63646982 | 3.43259376 | 9.67593347 | 9.95733496 | 0.34473017 | 974.835    | 9.553383   |
| 7.26685866 | 5.68635273 | 19.4378664 | 19.5293164 | 0.29117009 | 1777.86    | 17.423028  |
| 5.73786171 | 4.7439808  | 17.1504484 | 17.6310708 | 0.26906935 | 1004.715   | 9.846207   |
| 6.90224134 | 5.05575244 | 16.0260704 | 16.8364566 | 0.30028601 | 1576.17    | 15.446466  |
| 5.93952801 | 4.86420173 | 14.150269  | 14.6935933 | 0.33104236 | 1086.885   | 10.651473  |
| 7.09849564 | 5.28436641 | 19.9604355 | 20.1503781 | 0.26224651 | 1923.525   | 18.850545  |

|            |            |            |            |            |            |            |
|------------|------------|------------|------------|------------|------------|------------|
| 4.93406554 | 3.85386462 | 13.0531339 | 13.2688339 | 0.29044486 | 691.91122  | 6.78072996 |
| 5.02577626 | 4.1503664  | 12.6168314 | 13.110739  | 0.31656235 | 1048.0008  | 10.2704078 |
| 6.17644009 | 4.50841246 | 13.9965757 | 14.405874  | 0.31295654 | 1635.11194 | 16.024097  |
| 5.64510744 | 4.68408594 | 16.1129837 | 16.3351235 | 0.28674934 | 832.46856  | 8.15819189 |
| 3.0701177  | 2.63778223 | 6.53296435 | 6.74199123 | 0.39124676 | 618.08978  | 6.05727984 |
| 3.71796819 | 2.84944627 | 8.48923619 | 8.80609473 | 0.32357661 | 894.7554   | 8.76860292 |
| 5.1050973  | 4.12616005 | 11.4728433 | 12.0921892 | 0.34122523 | 1321.20604 | 12.9478192 |
| 4.25302025 | 3.25349976 | 10.5573604 | 11.0547572 | 0.29430766 | 723.05464  | 7.08593547 |
| 4.11528628 | 2.99245689 | 9.70842568 | 9.73189728 | 0.30748957 | 1068.43352 | 10.4706485 |
| 5.67210192 | 4.20994406 | 14.8280416 | 15.2429002 | 0.27619049 | 1204.37702 | 11.8028948 |
| 2.94151166 | 2.54914564 | 6.83904909 | 7.39171807 | 0.34486511 | 717.78168  | 7.03426046 |
| 4.2721347  | 3.31709651 | 9.16027869 | 9.67769185 | 0.34275699 | 786.16538  | 7.70442072 |
| 7.63626914 | 5.93303601 | 21.1198534 | 21.7084141 | 0.27330582 | 1186.01287 | 11.6229261 |
| 6.80236548 | 5.28462298 | 18.7918259 | 20.086552  | 0.26309259 | 219.12779  | 2.14745234 |
| 6.36772685 | 4.77896807 | 16.9842267 | 17.5814169 | 0.27181928 | 1724.63564 | 16.9014293 |
| 7.69048764 | 5.73564893 | 22.0884779 | 22.7772673 | 0.25181462 | 1495.22492 | 14.6532042 |
| 5.40987538 | 4.22559486 | 14.8373937 | 15.3445125 | 0.2753815  | 615.09301  | 6.0279115  |
| 7.5750282  | 5.2542966  | 20.0181517 | 20.2754755 | 0.25914542 | 821.91025  | 8.05472045 |
| 7.58750139 | 5.59506375 | 20.0070165 | 19.4778574 | 0.28725253 | 1431.49972 | 14.0286973 |
| 6.97810529 | 5.55377071 | 19.6182115 | 20.2519871 | 0.27423337 | 903.15988  | 8.85096682 |
| 6.09172157 | 5.06497229 | 18.024282  | 18.0873907 | 0.2800278  | 1588.92993 | 15.5715133 |
| 5.06587786 | 4.05615322 | 13.3760108 | 13.9725255 | 0.29029492 | 1235.54473 | 12.1083384 |
| 5.48890248 | 4.29420007 | 12.5738655 | 12.9839958 | 0.33073024 | 838.5657   | 8.21794386 |
| 6.81934708 | 5.5869873  | 20.8669968 | 20.5997169 | 0.2712167  | 883.89749  | 8.6621954  |
| 7.13436532 | 5.57049696 | 17.8172681 | 17.8871502 | 0.31142451 | 1888.87286 | 18.510954  |
| 6.94555891 | 5.28887964 | 17.5014394 | 17.816767  | 0.29684845 | 1364.87792 | 13.3758036 |
| 6.93267486 | 5.04237601 | 18.6594283 | 18.2046776 | 0.27698244 | 704.45312  | 6.90364058 |
| 5.68308701 | 4.06099804 | 15.4659719 | 15.166028  | 0.26776939 | 1090.28024 | 10.6847464 |
| 7.32420703 | 5.16376138 | 20.4881614 | 21.7373527 | 0.23755245 | 1026.98953 | 10.0644974 |
| 7.13374132 | 5.13062622 | 18.3853514 | 17.9756935 | 0.28542021 | 1144.73632 | 11.2184159 |
| 7.09896543 | 4.80564258 | 19.2700097 | 19.1218775 | 0.25131646 | 1063.0522  | 10.4179116 |
| 7.01063305 | 5.02665568 | 20.7387116 | 21.8393495 | 0.23016508 | 1406.15447 | 13.7803138 |
| 8.34925873 | 5.31043393 | 20.9024455 | 22.5839764 | 0.23514167 | 495.17377  | 4.85270295 |
| 5.71090366 | 4.08343411 | 11.5482372 | 12.2286486 | 0.33392358 | 1693.49719 | 16.5962725 |
| 3.88608136 | 3.11667195 | 9.23557801 | 9.81181723 | 0.31764472 | 1010.33408 | 9.90127398 |
| 6.39333506 | 3.92293962 | 17.1266756 | 18.3476962 | 0.21381102 | 204.09255  | 2.00010699 |
| 6.87415131 | 4.19544517 | 15.5728394 | 16.1549261 | 0.25970067 | 316.04205  | 3.09721209 |
| 6.10627133 | 3.72943547 | 15.4608944 | 15.6157962 | 0.23882455 | 155.86815  | 1.52750787 |
| 4.99015572 | 2.77623019 | 13.3273729 | 13.7303424 | 0.20219672 | 70.95876   | 0.69539585 |
| 8.10876022 | 5.19096065 | 23.8208447 | 25.0425956 | 0.20728525 | 397.67907  | 3.89725489 |
| 9.14341461 | 4.97698873 | 26.0533118 | 25.6454278 | 0.19406924 | 271.95117  | 2.66512147 |
| 8.31933641 | 4.58443115 | 21.6293973 | 22.4069645 | 0.20459849 | 208.05384  | 2.03892763 |
| 8.6833522  | 4.78491027 | 24.8819826 | 25.0395847 | 0.19109384 | 281.59605  | 2.75964129 |
| 6.36624    | 3.77577074 | 16.5912364 | 16.7651859 | 0.22521496 | 120.21654  | 1.17812209 |
| 8.43182788 | 4.46356121 | 26.3986223 | 26.7754865 | 0.16670327 | 123.255    | 1.207899   |
| 6.04405613 | 4.21277109 | 17.5465089 | 16.3406529 | 0.25780923 | 70.965     | 0.695457   |

|            |            |            |            |            |           |            |
|------------|------------|------------|------------|------------|-----------|------------|
| 7.23756245 | 4.40982372 | 22.4206201 | 21.6110092 | 0.2040545  | 306.27    | 3.001446   |
| 5.11286164 | 3.09221126 | 13.1768536 | 13.5164128 | 0.22877455 | 253.7612  | 2.48685976 |
| 6.91782967 | 3.87799954 | 20.7353544 | 20.1045776 | 0.19289137 | 207.95236 | 2.03793313 |
| 5.73411553 | 3.34763794 | 13.8728593 | 14.4493768 | 0.23168044 | 154.67844 | 1.51584871 |
| 7.23649414 | 4.01444884 | 20.7349455 | 20.404998  | 0.19673851 | 427.10367 | 4.18561597 |
| 7.61321785 | 4.47232429 | 23.2922186 | 23.4525637 | 0.19069661 | 368.59235 | 3.61220503 |
| 7.38223336 | 4.02191724 | 22.7619109 | 21.9574617 | 0.18316859 | 36.49716  | 0.35767217 |
| 6.98244372 | 3.85754043 | 21.3492249 | 21.2767179 | 0.18130336 | 45.04213  | 0.44141287 |
| 7.11446369 | 4.28771909 | 22.3858464 | 22.4208702 | 0.19123785 | 334.70213 | 3.28008087 |
| 6.98370965 | 4.04735628 | 19.596632  | 18.7878311 | 0.21542435 | 250.12141 | 2.45118982 |
| 7.7052727  | 4.49851286 | 25.8528943 | 26.1687601 | 0.17190394 | 362.79915 | 3.55543167 |
| 7.65645898 | 3.97398565 | 24.8617177 | 24.5666797 | 0.16176324 | 361.93017 | 3.54691567 |
| 6.97501707 | 3.67079843 | 18.5880105 | 18.7245108 | 0.19604242 | 185.79912 | 1.82083138 |
| 7.3940984  | 4.74730647 | 20.0643663 | 20.9476293 | 0.22662739 | 479.43298 | 4.6984432  |
| 5.04175077 | 2.91225711 | 12.9035305 | 13.6421455 | 0.21347501 | 41.92812  | 0.41089558 |
| 7.82636423 | 4.2618333  | 22.4673345 | 22.1795315 | 0.19215164 | 109.89004 | 1.07692239 |
| 8.46751102 | 4.34879335 | 23.1257019 | 22.6719459 | 0.19181386 | 342.13894 | 3.35296161 |
| 6.70749909 | 4.69233652 | 21.7233898 | 21.31556   | 0.22013668 | 88.65194  | 0.86878901 |

| sqrtn      | n/g        | resid.n    | comp1   | comp2   | negcomp1 | negcomp2 | pc1     |
|------------|------------|------------|---------|---------|----------|----------|---------|
| 3.52695585 | 86.2650315 | 5.35693372 | 2.1686  | -0.59   | -2.1686  | 0.59     | 0.1798  |
| 2.06553933 | 117.21024  | -1.8536918 | 4.2892  | -0.6162 | -4.2892  | 0.6162   | 0.6734  |
| 3.54005297 | 73.1153735 | 4.7301192  | 0.5834  | -0.4875 | -0.5834  | 0.4875   | 0.3984  |
| 1.92171545 | 62.3815921 | -3.097833  | 2.8113  | -0.4085 | -2.8113  | 0.4085   | 0.677   |
| 1.96588975 | 39.5975667 | -2.4998869 | 3.7505  | -0.2207 | -3.7505  | 0.2207   | 2.1348  |
| 3.24076344 | 181.704977 | 3.90068895 | 3.2277  | -0.3485 | -3.2277  | 0.3485   | 4.9894  |
| 2.21687376 | 50.9277646 | -2.6945955 | 1.0081  | -0.5628 | -1.0081  | 0.5628   | -0.7227 |
| 2.11802964 | 92.4958674 | -2.2694222 | 2.8892  | -0.2484 | -2.8892  | 0.2484   | -0.3129 |
| 2.42750699 | 84.423928  | -1.1957746 | 2.1552  | -0.5041 | -2.1552  | 0.5041   | 0.1383  |
| 3.38677125 | 42.8312901 | 2.96437569 | -0.9679 | -0.4353 | 0.9679   | 0.4353   | 0.6132  |
| 3.92762838 | 90.370619  | 7.21067467 | -0.3283 | -0.7959 | 0.3283   | 0.7959   | 0.7321  |
| 3.61366594 | 66.4558857 | 5.2081232  | 0.4763  | -0.9331 | -0.4763  | 0.9331   | -1.473  |
| 3.65908276 | 102.518274 | 5.26523755 | -0.1257 | -0.1979 | 0.1257   | 0.1979   | 0.3681  |
| 2.51724824 | 42.3282477 | -2.3225098 | -1.3055 | -0.6309 | 1.3055   | 0.6309   | -2.3321 |
| 4.20858786 | 82.8060392 | 9.69398167 | 0.1066  | -0.4927 | -0.1066  | 0.4927   | -1.0824 |
| 3.69943033 | 89.5080757 | 5.79521005 | 0.3879  | -0.1718 | -0.3879  | 0.1718   | -0.2178 |
| 2.12089849 | 75.2209095 | -1.9652831 | 3.5326  | -0.2224 | -3.5326  | 0.2224   | 0.767   |
| 2.84491213 | 87.973098  | 0.16242549 | 0.2986  | -0.2951 | -0.2986  | 0.2951   | -0.7013 |
| 2.00050604 | 71.720868  | -2.9104186 | 2.5433  | -0.2596 | -2.5433  | 0.2596   | -1.1097 |
| 1.83619831 | 67.703298  | -3.3440488 | 2.9769  | 0.2208  | -2.9769  | -0.2208  | 0.1985  |
| 2.73336039 | 64.0759779 | -0.120848  | 1.0456  | -0.5267 | -1.0456  | 0.5267   | -0.9041 |
| 3.840221   | 77.3730186 | 7.08666572 | 0.8946  | -0.2958 | -0.8946  | 0.2958   | 0.1579  |
| 3.44905422 | 52.4282724 | 3.70874782 | -0.2658 | -0.264  | 0.2658   | 0.264    | 0.1176  |
| 3.54327941 | 43.1585734 | 3.61224308 | -1.9303 | -0.2858 | 1.9303   | 0.2858   | 0.6207  |
| 3.50693713 | 37.4386849 | 3.03772312 | -2.6317 | -0.3509 | 2.6317   | 0.3509   | 1.5116  |
| 1.80490083 | 25.7930879 | -5.41731   | -1.3406 | 0.4813  | 1.3406   | -0.4813  | 1.5202  |
| 4.12557814 | 63.3434872 | 7.70764018 | -2.746  | -0.5306 | 2.746    | 0.5306   | -0.1949 |
| 4.00858042 | 61.5188247 | 7.07802773 | -2.0363 | -0.5333 | 2.0363   | 0.5333   | 0.9623  |
| 3.18418451 | 44.8828287 | 2.26193429 | 0.4176  | -0.5403 | -0.4176  | 0.5403   | 0.9198  |
| 4.16091564 | 55.6516201 | 7.63701161 | -3.5469 | -0.2203 | 3.5469   | 0.2203   | -0.1542 |
| 3.59964748 | 102.755448 | 5.35900168 | 1.0316  | -0.5376 | -1.0316  | 0.5376   | 1.4018  |
| 3.81200617 | 49.0262854 | 6.02069148 | -0.9786 | -0.6174 | 0.9786   | 0.6174   | 0.2542  |
| 2.79875722 | 161.839711 | 1.51871423 | 3.8613  | -0.1058 | -3.8613  | 0.1058   | 1.0721  |
| 3.20138095 | 39.2074981 | 1.60853372 | -1.2642 | -0.7103 | 1.2642   | 0.7103   | 0.0693  |
| 3.95341384 | 51.0267091 | 6.80842411 | -1.6625 | -0.4171 | 1.6625   | 0.4171   | 0.3421  |
| 4.01770121 | 48.7818767 | 7.07735424 | -2.1991 | -0.1702 | 2.1991   | 0.1702   | -0.0065 |
| 3.09085474 | 121.389873 | 3.11811615 | 3.5948  | -0.1369 | -3.5948  | 0.1369   | 1.5095  |
| 4.17409008 | 56.2577591 | 8.01660779 | -2.9524 | -1.0361 | 2.9524   | 1.0361   | -0.4657 |
| 3.13786663 | 59.8553617 | 1.55251712 | -0.5004 | -0.4576 | 0.5004   | 0.4576   | 0.3276  |
| 3.93019923 | 73.8358795 | 6.83760842 | -1.1949 | -0.7484 | 1.1949   | 0.7484   | 0.4496  |
| 3.26365945 | 100.961829 | 2.65035133 | 0.1443  | -0.8802 | -0.1443  | 0.8802   | -1.2254 |
| 4.34172143 | 68.1755696 | 9.68740976 | -2.4163 | -0.5062 | 2.4163   | 0.5062   | -1.1703 |

|            |            |            |         |         |         |         |         |
|------------|------------|------------|---------|---------|---------|---------|---------|
| 2.60398348 | 40.2895422 | -0.5226209 | 1.6819  | -0.3659 | -1.6819 | 0.3659  | 0.868   |
| 3.2047477  | 65.1262387 | 2.87774817 | 1.4851  | -0.5901 | -1.4851 | 0.5901  | -1.1782 |
| 4.00301099 | 144.491407 | 8.19909714 | 0.5324  | -0.4496 | -0.5324 | 0.4496  | -0.6185 |
| 2.85625487 | 42.1829984 | 0.00386559 | -0.1933 | -0.5782 | 0.1933  | 0.5782  | -0.244  |
| 2.46115417 | 165.499449 | 0.59941861 | 5.7486  | -0.1048 | -5.7486 | 0.1048  | 1.0135  |
| 2.96118269 | 210.278248 | 2.90358767 | 4.8514  | 0.1099  | -4.8514 | -0.1099 | 0.4973  |
| 3.59830782 | 91.8936777 | 5.71771254 | 1.8433  | -0.6829 | -1.8433 | 0.6829  | -1.2386 |
| 2.66194205 | 87.0508043 | 0.5775606  | 3.4337  | -0.0121 | -3.4337 | 0.0121  | 1.2896  |
| 3.23583815 | 127.380152 | 4.1447487  | 3.8358  | -0.095  | -3.8358 | 0.095   | -0.55   |
| 3.43553414 | 84.0063687 | 4.05254588 | 0.6969  | -0.2597 | -0.6969 | 0.2597  | -0.8091 |
| 2.65221803 | 145.036298 | 1.55861007 | 5.7094  | 0.0089  | -5.7094 | -0.0089 | 1.4355  |
| 2.77568383 | 91.8286141 | 1.33926677 | 3.7493  | -0.1984 | -3.7493 | 0.1984  | -0.1006 |
| 3.40924128 | 20.770061  | 1.8531441  | -3.7531 | -0.9132 | 3.7531  | 0.9132  | -1.9213 |
| 1.46541883 | 12.3629956 | -6.8043004 | -1.9505 | -0.4664 | 1.9505  | 0.4664  | -0.5791 |
| 4.11113479 | 58.4218088 | 8.31662336 | -1.1419 | -0.7018 | 1.1419  | 0.7018  | 0.7322  |
| 3.82795039 | 27.3176813 | 4.71928086 | -4.1148 | -0.8637 | 4.1148  | 0.8637  | 0.7123  |
| 2.45518054 | 18.2553346 | -1.7097763 | 0.7248  | -0.3305 | -0.7248 | 0.3305  | 1.2966  |
| 2.83808394 | 18.3729937 | -1.0587685 | -2.3069 | -0.1737 | 2.3069  | 0.1737  | -1.3    |
| 3.74549026 | 35.10685   | 4.67314861 | -2.8403 | -0.7672 | 2.8403  | 0.7672  | 0.3229  |
| 2.97505745 | 22.1329503 | -0.3690302 | -2.5416 | -0.6748 | 2.5416  | 0.6748  | -0.6991 |
| 3.94607569 | 58.3202746 | 6.79211574 | -1.5707 | -0.9041 | 1.5707  | 0.9041  | -0.9865 |
| 3.47970377 | 62.54307   | 4.60830837 | 1.2485  | -0.5293 | -1.2485 | 0.5293  | -0.9172 |
| 2.86669563 | 40.6024894 | 0.6759369  | 1.156   | -0.6876 | -1.156  | 0.6876  | -0.4781 |
| 2.94316078 | 25.0642228 | -0.5004407 | -2.4152 | -0.4708 | 2.4152  | 0.4708  | -1.1457 |
| 4.30243583 | 44.5617574 | 9.41484581 | -2.2686 | -1.1642 | 2.2686  | 1.1642  | -3.2258 |
| 3.65729458 | 37.8703387 | 4.2011871  | -2.4416 | -1.2401 | 2.4416  | 1.2401  | -1.7792 |
| 2.62747799 | 22.2411101 | -2.0013249 | -1.8474 | -0.6286 | 1.8474  | 0.6286  | -0.6825 |
| 3.26875303 | 37.0740678 | 2.77896915 | 0.3544  | -0.3877 | -0.3544 | 0.3877  | 0.4546  |
| 3.1724592  | 24.9244611 | 0.88806565 | -2.4456 | -0.0558 | 2.4456  | 0.0558  | -0.6597 |
| 3.34939038 | 30.2791253 | 2.31794314 | -1.8375 | -0.6101 | 1.8375  | 0.6101  | -1.6191 |
| 3.22767897 | 25.8124667 | 1.43080735 | -2.0284 | -0.3166 | 2.0284  | 0.3166  | -0.3502 |
| 3.71218451 | 27.0255223 | 4.33119053 | -3.0465 | -0.5333 | 3.0465  | 0.5333  | -0.6263 |
| 2.20288514 | 12.8073448 | -5.0350684 | -4.0131 | -0.4853 | 4.0131  | 0.4853  | -3.1488 |
| 4.07385229 | 94.1365426 | 9.23161257 | 1.5468  | -0.5751 | -1.5468 | 0.5751  | 0.7469  |
| 3.14662899 | 109.892053 | 3.67307844 | 4.0511  | -0.2141 | -4.0511 | 0.2141  | 1.3752  |
| 1.41425139 | 183.496054 | -5.772796  | 0.6472  | 0.9962  | -0.6472 | -0.9962 | 1.9726  |
| 1.7598898  | 64.6599601 | -4.8432812 | 0.2779  | 0.3908  | -0.2779 | -0.3908 | -2.8317 |
| 1.23592389 | 47.585915  | -5.8749086 | 1.4636  | 0.8162  | -1.4636 | -0.8162 | 0.4994  |
| 0.83390398 | 55.1901467 | -5.9844266 | 3.0559  | 1.0389  | -3.0559 | -1.0389 | 7.6393  |
| 1.97414662 | 25.9471031 | -5.9853885 | -4.0018 | 0.2815  | 4.0018  | -0.2815 | -7.2808 |
| 1.63251997 | 23.988492  | -7.2868633 | -4.1546 | 1.2781  | 4.1546  | -1.2781 | -6.2061 |
| 1.42791023 | 24.6247299 | -7.0557738 | -2.2655 | 1.1116  | 2.2655  | -1.1116 | -4.2872 |
| 1.66121681 | 19.2577899 | -6.9520991 | -3.6252 | 1.1199  | 3.6252  | -1.1199 | -6.0444 |
| 1.08541333 | 19.3134769 | -6.5433648 | 0.7605  | 0.7838  | -0.7605 | -0.7838 | -0.4987 |
| 1.09904459 | 28.2880328 | -8.3077521 | -3.1931 | 1.8427  | 3.1931  | -1.8427 | 1.6156  |
| 0.83394065 | 47.31      | -7.0500816 | 0.7075  | 0.5518  | -0.7075 | -0.5518 | 6.187   |



|            |            |            |         |        |         |         |         |
|------------|------------|------------|---------|--------|---------|---------|---------|
| 1.73246818 | 27.7141828 | -5.5548609 | -1.0791 | 1.4434 | 1.0791  | -1.4434 | 3.5084  |
| 1.57697805 | 38.7361333 | -4.2810917 | 2.8617  | 0.8107 | -2.8617 | -0.8107 | 0.5514  |
| 1.42756195 | 35.6282015 | -6.154649  | -0.2776 | 1.5035 | 0.2776  | -1.5035 | 1.2291  |
| 1.23119808 | 43.6844009 | -5.5086842 | 2.2963  | 0.9317 | -2.2963 | -0.9317 | 6.1011  |
| 2.0458778  | 28.8464229 | -4.1999695 | -0.7029 | 1.3328 | 0.7029  | -1.3328 | -1.1164 |
| 1.90058018 | 22.8331544 | -5.1401004 | -1.511  | 1.6961 | 1.511   | -1.6961 | -0.6821 |
| 0.59805699 | 4.79453308 | -8.0887232 | -0.8369 | 1.8185 | 0.8369  | -1.8185 | 2.8617  |
| 0.6643891  | 14.4725533 | -7.6644924 | -0.0866 | 1.9061 | 0.0866  | -1.9061 | 0.2471  |
| 1.81109936 | 18.4274206 | -5.3314542 | -1.2008 | 1.3466 | 1.2008  | -1.3466 | -0.3725 |
| 1.56562761 | 22.8017658 | -5.6252635 | -0.0217 | 1.2753 | 0.0217  | -1.2753 | 0.5755  |
| 1.88558523 | 16.762997  | -5.6787241 | -2.5728 | 1.7291 | 2.5728  | -1.7291 | 0.0217  |
| 1.88332569 | 20.7179653 | -5.4058809 | -1.9528 | 1.8741 | 1.9528  | -1.8741 | 0.5732  |
| 1.34938185 | 13.42796   | -6.0754613 | 0.3753  | 1.496  | -0.3753 | -1.496  | -0.0678 |
| 2.16758926 | 13.8760874 | -4.2744115 | -1.997  | 0.2086 | 1.997   | -0.2086 | -1.8008 |
| 0.64101137 | 29.1415302 | -5.9968707 | 3.6554  | 1.3705 | -3.6554 | -1.3705 | 5.8767  |
| 1.03774871 | 13.7713861 | -7.8385714 | -1.8706 | 1.1924 | 1.8706  | -1.1924 | 0.9184  |
| 1.83110939 | 16.7815897 | -5.6862848 | -2.1433 | 1.5471 | 2.1433  | -1.5471 | 0.4558  |
| 0.93208852 | 4.6335414  | -7.9047545 | -1.5578 | 0.5758 | 1.5578  | -0.5758 | -0.5267 |

| pc2     | clawmass | sqrt.clawmass | totalmusclemass | sqrtmusclemass | musclesample |
|---------|----------|---------------|-----------------|----------------|--------------|
| -1.021  | 0.89     | 0.943398113   | 0.1442          | 0.379736751    | 0.0298       |
| -0.9612 | 0.45     | 0.670820393   | 0.0364          | 0.19078784     | 0.0108       |
| -0.908  | 1.31     | 1.144552314   | 0.1714          | 0.414004831    | 0.0172       |
| -0.6783 | 0.74     | 0.860232527   | 0.0592          | 0.243310501    | 0.0312       |
| -0.4856 | 0.55     | 0.741619849   | 0.0976          | 0.312409987    | 0.033        |
| -1.2057 | 0.65     | 0.806225775   | 0.0578          | 0.240416306    | 0.0168       |
| -0.8632 | 1.19     | 1.090871211   | 0.0965          | 0.310644491    | 0.0224       |
| -0.1992 | 0.72     | 0.848528137   | 0.0485          | 0.220227155    | 0.0106       |
| -0.8368 | 0.89     | 0.943398113   | 0.0698          | 0.264196896    | 0.0123       |
| -0.8661 | 1.8      | 1.341640786   | 0.2678          | 0.517493961    | 0.0353       |
| -1.5209 | 1.59     | 1.260952021   | 0.1707          | 0.413158565    | 0.0237       |
| -1.3788 | 1.34     | 1.15758369    | 0.1965          | 0.443283205    | 0.0302       |
| -0.379  | 1.52     | 1.232882801   | 0.1306          | 0.36138622     | 0.0157       |
| -0.8225 | 1.92     | 1.385640646   | 0.1497          | 0.386910842    | 0.0519       |
| -0.7315 | 1.45     | 1.204159458   | 0.2139          | 0.462493243    | 0.0507       |
| -0.2811 | 1.37     | 1.170469991   | 0.1529          | 0.391024296    | 0.041        |
| -0.2977 | 0.59     | 0.768114575   | 0.0598          | 0.244540385    | 0.008        |
| -0.4469 | 1.39     | 1.178982612   | 0.092           | 0.303315018    | 0.0261       |
| -0.1583 | 0.8      | 0.894427191   | 0.0558          | 0.236220236    | 0.0194       |
| 0.6192  | 0.71     | 0.842614977   | 0.0498          | 0.223159136    | 0.0189       |
| -0.7618 | 1.18     | 1.086278049   | 0.1166          | 0.341467422    | 0.0367       |
| -0.459  | 1.22     | 1.104536102   | 0.1906          | 0.436577599    | 0.0718       |
| -0.5168 | 1.83     | 1.352774926   | 0.2269          | 0.476340215    | 0.0441       |
| -0.7434 | 2.48     | 1.574801575   | 0.2909          | 0.539351462    | 0.0511       |
| -0.9495 | 2.3      | 1.516575089   | 0.3285          | 0.573149195    | 0.0924       |
| 0.6472  | 1.79     | 1.337908816   | 0.1263          | 0.355387113    | 0.0435       |
| -1.0481 | 2.64     | 1.624807681   | 0.2687          | 0.518362807    | 0.0438       |
| -1.1944 | 2.13     | 1.459451952   | 0.2612          | 0.511077294    | 0.0797       |
| -1.168  | 1.36     | 1.166190379   | 0.2259          | 0.475289386    | 0.0472       |
| -0.5616 | 2.79     | 1.670329309   | 0.3111          | 0.557763391    | 0.0567       |
| -1.138  | 1.22     | 1.104536102   | 0.1261          | 0.355105618    | 0.0349       |
| -1.212  | 2.06     | 1.435270009   | 0.2964          | 0.544426304    | 0.0908       |
| -0.1058 | 0.54     | 0.734846923   | 0.0484          | 0.22           | 0.0316       |
| -1.3403 | 2.08     | 1.44222051    | 0.2614          | 0.511272921    | 0.11         |
| -0.8503 | 2.22     | 1.489966443   | 0.3063          | 0.553443764    | 0.047        |
| -0.4547 | 2.31     | 1.519868415   | 0.3309          | 0.575239081    | 0.0609       |
| -0.2633 | 0.61     | 0.781024968   | 0.0787          | 0.280535203    | 0.0256       |
| -2.0022 | 2.54     | 1.593737745   | 0.3097          | 0.556506963    | 0.034        |
| -0.8223 | 1.64     | 1.280624847   | 0.1645          | 0.405585996    | 0.0468       |
| -1.5668 | 1.88     | 1.37113092    | 0.2092          | 0.457383865    | 0.0418       |
| -1.3732 | 1.44     | 1.2           | 0.1055          | 0.324807635    | 0.0288       |
| -0.849  | 2.33     | 1.526433752   | 0.2765          | 0.525832673    | 0.0489       |

|         |        |             |        |             |        |
|---------|--------|-------------|--------|-------------|--------|
| -0.6893 | 0.9263 | 0.962444804 | 0.1683 | 0.41024383  | 0.0793 |
| -0.8178 | 1.0388 | 1.019215384 | 0.1577 | 0.397114593 | 0.0666 |
| -0.7181 | 1.2992 | 1.139824548 | 0.1109 | 0.333016516 | 0.0304 |
| -0.9918 | 1.4489 | 1.203702621 | 0.1934 | 0.439772669 | 0.0529 |
| 0.0119  | 0.2775 | 0.526782688 | 0.0366 | 0.191311265 | 0.0233 |
| 0.4366  | 0.3886 | 0.623377895 | 0.0417 | 0.204205779 | 0.0342 |
| -0.9504 | 0.9696 | 0.98468269  | 0.1409 | 0.375366488 | 0.0377 |
| -0.0135 | 0.5948 | 0.771232779 | 0.0814 | 0.285306852 | 0.0455 |
| 0.0983  | 0.6029 | 0.776466355 | 0.0822 | 0.286705424 | 0.025  |
| -0.2879 | 1.2639 | 1.124233072 | 0.1405 | 0.374833296 | 0.0343 |
| 0.1459  | 0.2895 | 0.538052042 | 0.0485 | 0.220227155 | 0.0194 |
| -0.1735 | 0.538  | 0.733484833 | 0.0839 | 0.289654967 | 0.0364 |
| -1.5647 | 3.14   | 1.772004515 | 0.5596 | 0.748064168 | 0.1036 |
| -0.8285 | 2.1    | 1.449137675 | 0.1737 | 0.41677332  | 0.0494 |
| -1.4506 | 2.03   | 1.424780685 | 0.2893 | 0.537866154 | 0.0943 |
| -1.866  | 3.27   | 1.808314132 | 0.5364 | 0.732393337 | 0.0747 |
| -0.7251 | 1.21   | 1.1         | 0.3302 | 0.574630316 | 0.116  |
| -0.2461 | 2.26   | 1.503329638 | 0.4384 | 0.662117814 | 0.0583 |
| -1.5929 | 2.48   | 1.574801575 | 0.3996 | 0.632139225 | 0.1018 |
| -1.2427 | 2.25   | 1.5         | 0.3999 | 0.63237647  | 0.0509 |
| -1.5559 | 2.11   | 1.452583905 | 0.267  | 0.516720427 | 0.0925 |
| -0.7356 | 1.15   | 1.072380529 | 0.1936 | 0.44        | 0.0994 |
| -1.1544 | 1.04   | 1.019803903 | 0.2024 | 0.449888875 | 0.0917 |
| -0.7012 | 2.27   | 1.506651917 | 0.3456 | 0.587877538 | 0.0567 |
| -1.7572 | 2.29   | 1.513274595 | 0.4154 | 0.644515322 | 0.1682 |
| -2.2619 | 2.4    | 1.549193338 | 0.3532 | 0.594306318 | 0.0756 |
| -1.155  | 2.02   | 1.42126704  | 0.3104 | 0.557135531 | 0.1059 |
| -0.7764 | 1.48   | 1.216552506 | 0.2882 | 0.536842621 | 0.0832 |
| -0.097  | 2.21   | 1.486606875 | 0.4038 | 0.635452595 | 0.1497 |
| -0.9954 | 2.12   | 1.456021978 | 0.3705 | 0.608687112 | 0.0668 |
| -0.7167 | 2.39   | 1.545962483 | 0.4036 | 0.635295207 | 0.1193 |
| -1.0722 | 2.76   | 1.661324773 | 0.5099 | 0.714072825 | 0.1091 |
| -0.788  | 2.93   | 1.711724277 | 0.3789 | 0.615548536 | 0.0695 |
| -1.1461 | 1.08   | 1.039230485 | 0.1763 | 0.419880936 | 0.0532 |
| -0.3168 | 0.55   | 0.741619849 | 0.0901 | 0.30016662  | 0.0451 |
| 1.5789  | 0.6601 | 0.812465384 | 0.0109 | 0.104403065 | 0.004  |
| 1.0286  | 0.6693 | 0.818107572 | 0.0479 | 0.218860686 | 0.013  |
| 1.4777  | 0.5629 | 0.750266619 | 0.0321 | 0.179164729 | 0.0139 |
| 0.8773  | 0.4191 | 0.647379332 | 0.0126 | 0.112249722 | 0.0019 |
| 1.3413  | 1.4273 | 1.194696614 | 0.1502 | 0.387556448 | 0.0246 |
| 2.887   | 1.5159 | 1.231218908 | 0.1111 | 0.333316666 | 0.0501 |
| 2.3953  | 1.1664 | 1.08        | 0.0828 | 0.287749891 | 0.0083 |
| 2.6515  | 1.3386 | 1.156978824 | 0.1433 | 0.378549865 | 0.0346 |
| 1.4915  | 0.6268 | 0.791707017 | 0.061  | 0.246981781 | 0.0129 |
| 2.9501  | 2.64   | 1.624807681 | 0.0427 | 0.206639783 | 0.037  |
| 0.1968  | 1.28   | 1.13137085  | 0.0147 | 0.121243557 | 0.0016 |

|        |        |             |        |             |        |
|--------|--------|-------------|--------|-------------|--------|
| 2.0921 | 1.85   | 1.360147051 | 0.1083 | 0.329089653 | 0.0468 |
| 1.5313 | 0.7268 | 0.852525659 | 0.0642 | 0.253377189 | 0.0399 |
| 2.5243 | 1.3228 | 1.150130427 | 0.0572 | 0.239165215 | 0.0338 |
| 0.8625 | 0.85   | 0.921954446 | 0.0347 | 0.18627936  | 0.0097 |
| 2.5191 | 1.59   | 1.260952021 | 0.1451 | 0.380919939 | 0.0631 |
| 3.168  | 1.77   | 1.33041347  | 0.1582 | 0.397743636 | 0.0718 |
| 2.8861 | 1.68   | 1.29614814  | 0.0746 | 0.273130006 | 0.0227 |
| 3.4818 | 1.22   | 1.104536102 | 0.0305 | 0.174642492 | 0.0136 |
| 2.5298 | 2.05   | 1.431782106 | 0.178  | 0.421900462 | 0.0828 |
| 2.214  | 1.34   | 1.15758369  | 0.1075 | 0.327871926 | 0.0456 |
| 3.1272 | 2.31   | 1.519868415 | 0.2121 | 0.460543158 | 0.0657 |
| 3.2516 | 2.11   | 1.452583905 | 0.1712 | 0.413763217 | 0.0633 |
| 2.675  | 1.474  | 1.214084017 | 0.1356 | 0.368239053 | 0.0514 |
| 0.5172 | 2.1752 | 1.474855925 | 0.3386 | 0.581893461 | 0.1066 |
| 1.8454 | 0.4999 | 0.707036067 | 0.0141 | 0.118743421 | 0.0067 |
| 1.9025 | 1.9046 | 1.380072462 | 0.0782 | 0.279642629 | 0.0071 |
| 2.538  | 2.2111 | 1.486976799 | 0.1998 | 0.446989933 | 0.0584 |
| 1.1288 | 1.838  | 1.355728586 | 0.1875 | 0.433012702 | 0.0863 |
